# Supplementary material
Source: Springer Nature journal article supplement (https://www.springermedizin.de/resource/supplementary/12984_2012_418_MOESM2_ESM.pdf/9604532)
Supplement: MOESM2 [file 9604532]

**Inquiries, assessed for eligibility**  
*n = 48*

**Excluded (*n = 29*)**

Did not meet inclusion criteria (*n = 19*)  
Unable/unwilling to meet schedule (*n = 4*)  
No response following original inquiry (*n = 6*)

**Randomized**  
*n = 19*

**Order A**  
*n = 9*

**Order B**  
*n = 10*

**Completed therapy 1 (*n = 19*)**

*n = 9*

*n = 10*

**Completed therapy 2 (*n = 18*)**

*n = 9*

*n = 9*

*n = 1* did not initiate  
therapy 2, due to  
transport issues

**Completed 6 Month Follow-up (*n = 17*)**

*n = 9*

*n = 8*

*n = 1* lost to follow up,  
unable to contact
